# Supplementary material for: Preparation of N/S doped carbon dots and their application in nitrite detection
Source: Royal Society of Chemistry journal article supplement (doi:10.1039/d0ra10766b), 2021-01-01
Supplement: d0ra10766b1.pdf [file d0ra10766b1.pdf]

## Supplementary Material

*for*

### Preparation of N/S Doped Carbon Dots and Their Applications in Nitrite Detection

Yafeng Deng, Jun Qian\*, Yihua Zhou, Yifan Niu

(School of Printing and Packaging, Wuhan University, Wuhan 430079, Hubei, China)

#### 1 Results and Discussion

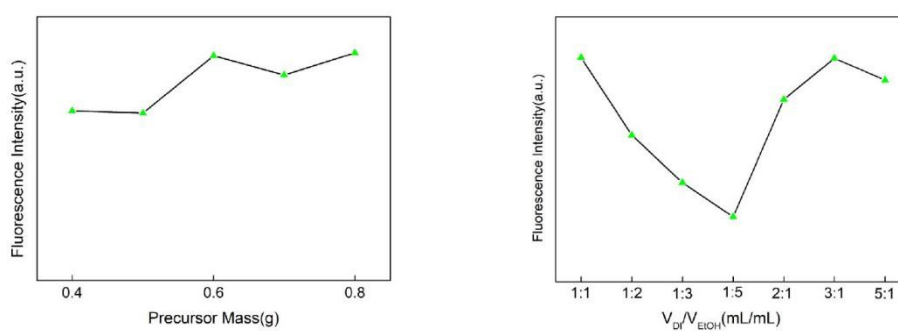

**Figure S1.** Fluorescence intensity of CDs with different masses of reactants, various ratios of reactant solvents

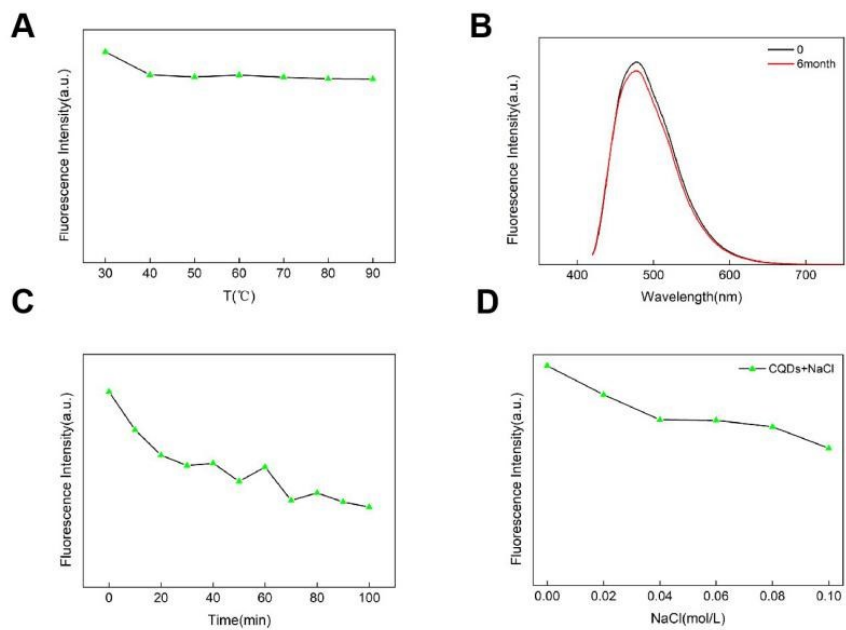

**Figure S2.** Fluorescence intensity of CDs towards different temperature (A), time (B), irradiation time (C), concentrations of NaCl (D)

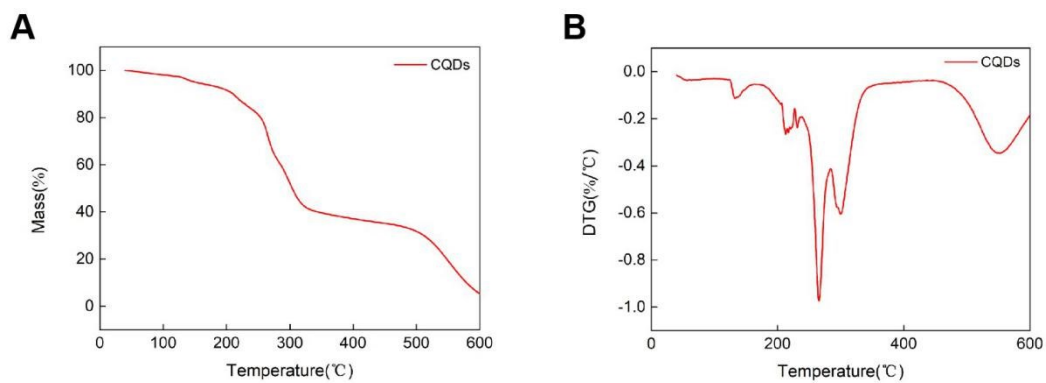

**Figure S3.** Thermogravimetric curve (TG) and differential thermogravimetric curve (DTG) of CDs

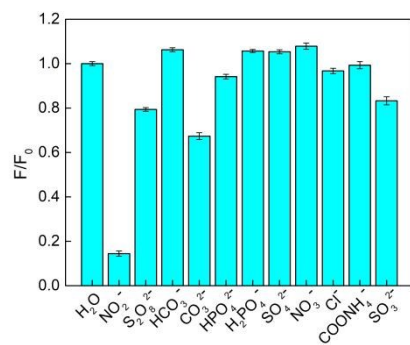

**Figure S4.** Selectivity of CDs detecting NO<sub>2</sub><sup>-</sup>

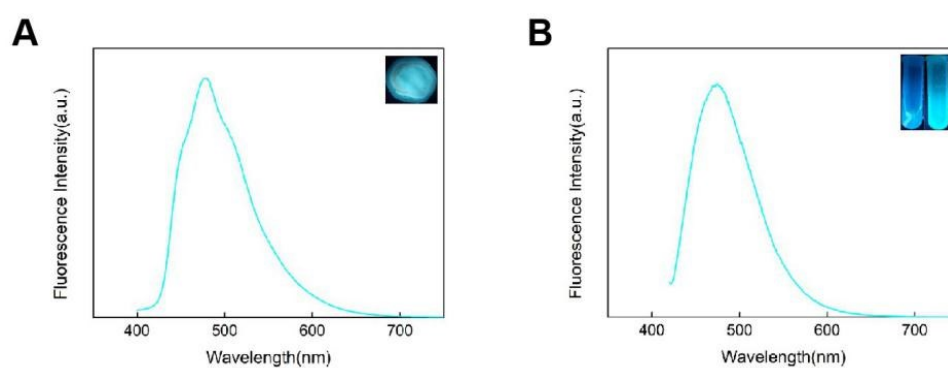

**Figure S5.** (A) Fluorescence intensity of methylcellulose/CDs film (excitation wavelength 400nm) and photo; (B) Fluorescence intensity of methylcellulose/CDs film after dissolution in water (excitation wavelength 400nm) and Photo of the film before and after dissolution.
